# Supplementary material
Source: PubMed Central journal article supplement (PMC7472717)
Supplement: aim-olf-L201067-L20-1067_Supplement.pdf [file aim-olf-L201067-L20-1067_Supplement.pdf]

## Supplementary Material\*

Chou R, Dana T, Jungbauer R, et al. Update Alert 2: masks for prevention of respiratory virus infections, including SARS-CoV-2, in health care and community settings. *Ann Intern Med.* 27 August 2020. [Epub ahead of print]. doi:10.7326/L20-1067

*Supplement Table 1.* Study characteristics of observational studies of mask use and risk of SARS-CoV-2 infection in healthcare settings – Update Alert #2

*Supplement Table 2.* Mask use and risk of SARS-CoV-2 infection in healthcare settings – Update Alert #2

*Supplement Table 3.* Quality assessment of observational studies of mask use and risk of SARS-CoV-2 infection in healthcare settings – Update Alert #2

*Supplement Table 4.* Masks for prevention of respiratory virus infections evidence map – Update Alert #2

### *References*

\*This supplementary material was provided by the authors to give readers further details on their article. The material was reviewed but not copyedited.

**Supplement Table 1. Study characteristics of observational studies of mask use and risk of SARS-CoV-2 infection in healthcare settings – Update Alert #2**

| <b>Author, year<br/>Country<br/>Study<br/>design</b>        | <b>Inclusion criteria</b>                                                                  | <b>Sample size</b>                                             | <b>Age (mean, years)</b> | <b>Female (%)</b> | <b>Definition of infection</b> |
|-------------------------------------------------------------|--------------------------------------------------------------------------------------------|----------------------------------------------------------------|--------------------------|-------------------|--------------------------------|
| Chatterjee et al, 2020 (2)<br><br>India<br><br>Case-control | Healthcare workers undergoing SARS-CoV-2 testing between April week 1 and May week 1, 2020 | 378 healthcare worker cases and 373 healthcare worker controls | 35 (cases)               | 42% (cases)       | SARS-CoV-2 infection (PCR)     |

**Supplement Table 2. Mask use and risk of SARS-CoV-2 infection in healthcare settings – Update Alert #2**

| Author, Year<br>(Reference)                                    | Mask Use Versus Nonuse                     | Comparison of<br>Mask Types | Consistency of Mask Use | Multiple Mask<br>Layers Versus<br>Single Layer |
|----------------------------------------------------------------|--------------------------------------------|-----------------------------|-------------------------|------------------------------------------------|
| <b>SARS-CoV-2</b>                                              |                                            |                             |                         |                                                |
| Chatterjee et al, 2020<br>(2)<br><br>India<br><br>Case-control | Any mask vs. no mask: OR, 0.35 (0.22-0.57) | -                           | -                       | -                                              |

**Supplement Table 3. Quality assessment of observational studies of mask use and risk of SARS-CoV-2 infection in healthcare settings – Update Alert #2**

| <b>Author,<br/>year<br/>Country</b> | <b>Did the study attempt to enroll all (or a random sample of) patients meeting inclusion criteria (inception cohort)?</b> | <b>Did the study use accurate methods for ascertaining exposures and potential confounders?</b> | <b>Were outcome assessors and/or data analysts blinded to exposure being studied?</b> | <b>Did the article report attrition or missing data?</b> | <b>Is there high attrition?</b> | <b>Were outcomes pre-specified and defined, and ascertained using accurate methods?</b> | <b>Other sources of potential bias</b>                                      | <b>Quality rating</b> |
|-------------------------------------|----------------------------------------------------------------------------------------------------------------------------|-------------------------------------------------------------------------------------------------|---------------------------------------------------------------------------------------|----------------------------------------------------------|---------------------------------|-----------------------------------------------------------------------------------------|-----------------------------------------------------------------------------|-----------------------|
| Chatterjee et al, 2020 (2)          | No                                                                                                                         | Unclear (self-report)                                                                           | No                                                                                    | No                                                       | Unclear                         | Yes                                                                                     | Potential recall bias; 40% of eligible cases were not included in the study | Poor                  |

**Supplement Table 4. Masks for prevention of respiratory virus infections evidence map – Update Alert #2**

| Comparison (intervention A vs. intervention B)                                                             | SARS-CoV-2 infection* | SARS-CoV-1 or MERS-CoV infection* | Influenza, influenzalike illness, and other viral respiratory illness (excluding pandemic coronaviruses) † |
|------------------------------------------------------------------------------------------------------------|-----------------------|-----------------------------------|------------------------------------------------------------------------------------------------------------|
| <b>Community setting</b>                                                                                   |                       |                                   |                                                                                                            |
| Mask (type not specified) vs. no mask (k=4 observational studies) (3-6)                                    | ■                     | ◆                                 | -                                                                                                          |
| N95‡ vs. surgical mask in household contacts (k=1 RCT) (7)                                                 | -                     | -                                 | ◆                                                                                                          |
| N95‡ vs. no mask in household contacts (k=1 RCT) (7)                                                       | -                     | -                                 | ◆                                                                                                          |
| Surgical mask vs. no mask in households with an index case and other community settings (k=12 RCTs) (7-18) | -                     | -                                 | ●                                                                                                          |
| <b>Healthcare setting – moderate or higher risk (inpatient)</b>                                            |                       |                                   |                                                                                                            |
| Any mask vs. no mask (k=13 observational studies) (2, 19-30)                                               | ■                     | ●                                 | -                                                                                                          |
| N95 vs. no mask (k=5 observational studies) (19, 25-27, 31)                                                | ■                     | ◆                                 | -                                                                                                          |
| Surgical mask vs. no mask (k=6 observational studies) (19, 20, 22, 25, 26, 29)                             | -                     | ■                                 | -                                                                                                          |
| N95 or surgical mask vs. no mask (k=1 observational study) (30)                                            | -                     | ■                                 | -                                                                                                          |
| Mask (type not specified) vs. no mask (k=5 observational studies) (21, 23, 26, 28, 29)                     | -                     | ◆                                 | -                                                                                                          |
| Cloth mask vs. no mask (k=3 observational studies) (19, 24, 29)                                            | -                     | ■                                 | -                                                                                                          |
| Consistent/always mask use vs. inconsistent mask use (k=5 observational studies) (20, 23, 32, 33)          | ■                     | ◆                                 | -                                                                                                          |
| N95 vs. surgical mask (k=3 RCTs and 5 observational studies) (19, 20, 25, 30, 34-37)                       | -                     | ◆                                 | ●                                                                                                          |
| N95 or surgical mask vs. cloth mask (k=3 observational studies) (19, 21, 29)                               | -                     | ■                                 | -                                                                                                          |
| Surgical mask vs. cloth mask (k=1 RCT) (38)                                                                | -                     | -                                 | ◆                                                                                                          |
| <b>Healthcare setting – lower risk (outpatient)</b>                                                        |                       |                                   |                                                                                                            |
| N95 vs. surgical mask (k=1 RCT) (39)                                                                       | -                     | -                                 | ●                                                                                                          |

\* Only observational evidence was included for these infections

† Only RCT evidence was included for these infections

‡ N95 or equivalent (e.g. P2 mask)

**Strength of evidence**

- Moderate
- ◆ Low
- Insufficient
- No evidence

**Direction of effect**

- |  |                                    |
|--|------------------------------------|
|  | Favors intervention A              |
|  | Effects similar or no difference   |
|  | No evidence or unable to determine |

## References

1. Chou R, Dana T, Jungbauer R, et al. Masks for prevention of respiratory virus infections, including SARS-CoV-2, in health care and community settings: a living rapid review. *Ann Intern Med.* 2020. Epub 2020/06/25. doi: 10.7326/m20-3213. PubMed PMID: 32579379; PubMed Central PMCID: PMC7322812.
2. Chatterjee P, Anand T, Singh KJ, et al. Healthcare workers & SARS-CoV-2 infection in India: A case-control investigation in the time of COVID-19. *Indian J Med Res.* 2020;151(5):459-67. Epub 2020/07/03. doi: 10.4103/ijmr.IJMR\_2234\_20. PubMed PMID: 32611916.
3. Wang Y, Tian H, Zhang L, et al. Reduction of secondary transmission of SARS-CoV-2 in households by face mask use, disinfection and social distancing: a cohort study in Beijing, China. *BMJ Glob Health.* 2020;5(5). Epub 2020/05/30. doi: 10.1136/bmjgh-2020-002794. PubMed PMID: 32467353.
4. Lau JT, Lau M, Kim JH, et al. Probable secondary infections in households of SARS patients in Hong Kong. *Emerg Infect Dis.* 2004c;10(2):235-43. Epub 2004/03/20. doi: 10.3201/eid1002.030626. PubMed PMID: 15030689; PubMed Central PMCID: PMC3322902.
5. Tuan PA, Horby P, Dinh PN, et al. SARS transmission in Vietnam outside of the health-care setting. *Epidemiol Infect.* 2007;135(3):392-401. Epub 2006/07/28. doi: 10.1017/s0950268806006996. PubMed PMID: 16870029; PubMed Central PMCID: PMC2870589.
6. Wu J, Xu F, Zhou W, et al. Risk factors for SARS among persons without known contact with SARS patients, Beijing, China. *Emerg Infect Dis.* 2004;10(2):210-6. doi: 10.3201/eid1002.030730. PubMed PMID: 15030685.
7. MacIntyre CR, Cauchemez S, Dwyer DE, et al. Face mask use and control of respiratory virus transmission in households. *Emerg Infect Dis.* 2009;15(2):233-41. Epub 2009/02/06. doi: 10.3201/eid1502.081167. PubMed PMID: 19193267; PubMed Central PMCID: PMC2662657.
8. Canini L, Andreatti L, Ferrari P, et al. Surgical mask to prevent influenza transmission in households: a cluster randomized trial. *PLoS One.* 2010;5(11):e13998. Epub 2010/11/26. doi: 10.1371/journal.pone.0013998. PubMed PMID: 21103330; PubMed Central PMCID: PMC2984432.
9. Cowling BJ, Chan KH, Fang VJ, et al. Facemasks and hand hygiene to prevent influenza transmission in households: a cluster randomized trial. *Ann Intern Med.* 2009;151(7):437-46. Epub 2009/08/05. doi: 10.7326/0003-4819-151-7-200910060-00142. PubMed PMID: 19652172.
10. Cowling BJ, Fung RO, Cheng CK, et al. Preliminary findings of a randomized trial of non-pharmaceutical interventions to prevent influenza transmission in households. *PLoS One.* 2008;3(5):e2101. Epub 2008/05/08. doi: 10.1371/journal.pone.0002101. PubMed PMID: 18461182; PubMed Central PMCID: PMC2364646.
11. Larson EL, Ferng YH, Wong-McLoughlin J, et al. Impact of non-pharmaceutical interventions on URIs and influenza in crowded, urban households. *Public Health Rep.* 2010;125(2):178-91. Epub 2010/03/20. doi: 10.1177/003335491012500206. PubMed PMID: 20297744; PubMed Central PMCID: PMC2821845.
12. MacIntyre CR, Zhang Y, Chughtai AA, et al. Cluster randomised controlled trial to examine medical mask use as source control for people with respiratory illness. *BMJ Open.* 2016;6(12):e012330. Epub 2017/01/01. doi: 10.1136/bmjopen-2016-012330. PubMed PMID: 28039289; PubMed Central PMCID: PMC5223715.

13. Simmerman JM, Suntarattiwong P, Levy J, et al. Findings from a household randomized controlled trial of hand washing and face masks to reduce influenza transmission in Bangkok, Thailand. *Influenza Other Respir Viruses*. 2011;5(4):256-67. Epub 2011/06/10. doi: 10.1111/j.1750-2659.2011.00205.x. PubMed PMID: 21651736; PubMed Central PMCID: PMC4634545.
14. Suess T, Remschmidt C, Schink SB, et al. The role of facemasks and hand hygiene in the prevention of influenza transmission in households: results from a cluster randomised trial; Berlin, Germany, 2009-2011. *BMC Infect Dis*. 2012;12:26. Epub 2012/01/28. doi: 10.1186/1471-2334-12-26. PubMed PMID: 22280120; PubMed Central PMCID: PMC3285078.
15. Aiello AE, Murray GF, Perez V, et al. Mask use, hand hygiene, and seasonal influenza-like illness among young adults: a randomized intervention trial. *J Infect Dis*. 2010;201(4):491-8. Epub 2010/01/22. doi: 10.1086/650396. PubMed PMID: 20088690.
16. Aiello AE, Perez V, Coulborn RM, et al. Facemasks, hand hygiene, and influenza among young adults: a randomized intervention trial. *PLoS One*. 2012;7(1):e29744. Epub 2012/02/02. doi: 10.1371/journal.pone.0029744. PubMed PMID: 22295066; PubMed Central PMCID: PMC3266257.
17. Alfelali M, Haworth EA, Barasheed O, et al. Facemask versus no facemask in preventing viral respiratory infections during Hajj: a cluster randomised open label trial March 8, 2019. Available from: [https://papers.ssrn.com/sol3/papers.cfm?abstract\\_id=3349234](https://papers.ssrn.com/sol3/papers.cfm?abstract_id=3349234).
18. Barasheed O, Almasri N, Badahdah AM, et al. Pilot randomised controlled trial to test effectiveness of facemasks in preventing influenza-like illness transmission among Australian Hajj pilgrims in 2011. *Infect Disord Drug Targets*. 2014;14(2):110-6. Epub 2014/10/23. doi: 10.2174/1871526514666141021112855. PubMed PMID: 25336079.
19. Liu W, Tang F, Fang L-Q, et al. Risk factors for SARS infection among hospital healthcare workers in Beijing: a case control study. *Trop Med Int Health*. 2009;14(s1):52-9. doi: 10.1111/j.1365-3156.2009.02255.x.
20. Loeb M, McGeer A, Henry B, et al. SARS among critical care nurses, Toronto. *Emerg Infect Dis*. 2004;10(2):251-5. Epub 2004/03/20. doi: 10.3201/eid1002.030838. PubMed PMID: 15030692; PubMed Central PMCID: PMC3322898.
21. Ma HJ, Wang HW, Fang LQ, et al. [A case-control study on the risk factors of severe acute respiratory syndromes among health care workers]. *Zhonghua Liu Xing Bing Xue Za Zhi*. 2004;25(9):741-4. Epub 2004/11/24. PubMed PMID: 15555351.
22. Nishiura H, Kuratsuji T, Quy T, et al. Rapid awareness and transmission of severe acute respiratory syndrome in Hanoi French Hospital, Vietnam. *Am J Trop Med Hyg*. 2005;73(1):17-25. Epub 2005/07/15. PubMed PMID: 16014825.
23. Nishiyama A, Wakasugi N, Kirikae T, et al. Risk factors for SARS infection within hospitals in Hanoi, Vietnam. *Jpn J Infect Dis*. 2008;61(5):388-90. Epub 2008/09/23. PubMed PMID: 18806349.
24. Pei LY, Gao ZC, Yang Z, et al. [Investigation of the influencing factors on severe acute respiratory syndrome among health care workers]. *Beijing Da Xue Xue Bao Yi Xue Ban*. 2006;38(3):271-5. Epub 2006/06/17. PubMed PMID: 16778970.
25. Raboud J, Shigayeva A, McGeer A, et al. Risk factors for SARS transmission from patients requiring intubation: a multicentre investigation in Toronto, Canada. *PLoS One*. 2010;5(5):e10717. Epub 2010/05/27. doi: 10.1371/journal.pone.0010717. PubMed PMID: 20502660; PubMed Central PMCID: PMC2873403.

26. Seto WH, Tsang D, Yung RW, et al. Effectiveness of precautions against droplets and contact in prevention of nosocomial transmission of severe acute respiratory syndrome (SARS). *Lancet*. 2003;361(9368):1519-20. Epub 2003/05/10. doi: 10.1016/s0140-6736(03)13168-6. PubMed PMID: 12737864; PubMed Central PMCID: PMC7112437.
27. Teleman MD, Boudville IC, Heng BH, et al. Factors associated with transmission of severe acute respiratory syndrome among health-care workers in Singapore. *Epidemiol Infect*. 2004;132(5):797-803. Epub 2004/10/12. doi: 10.1017/s0950268804002766. PubMed PMID: 15473141; PubMed Central PMCID: PMC2870165.
28. Wilder-Smith A, Teleman MD, Heng BH, et al. Asymptomatic SARS coronavirus infection among healthcare workers, Singapore. *Emerging infectious diseases*. 2005;11(7):1142-5. Epub 2005/07/19. doi: 10.3201/eid1107.041165. PubMed PMID: 16022801; PubMed Central PMCID: PMC3371799.
29. Yin WW, Gao LD, Lin WS, et al. [Effectiveness of personal protective measures in prevention of nosocomial transmission of severe acute respiratory syndrome]. *Zhonghua Liu Xing Bing Xue Za Zhi*. 2004;25(1):18-22. Epub 2004/04/06. PubMed PMID: 15061941.
30. Scales DC, Green K, Chan AK, et al. Illness in intensive care staff after brief exposure to severe acute respiratory syndrome. *Emerg Infect Dis*. 2003;9(10):1205-10. Epub 2003/11/12. doi: 10.3201/eid0910.030525. PubMed PMID: 14609453; PubMed Central PMCID: PMC3033076.
31. Wang X, Pan Z, Cheng Z. Association between 2019-nCoV transmission and N95 respirator use. *J Hosp Infect*. 2020(March 3). doi: 10.1016/j.jhin.2020.02.021.
32. Alraddadi BM, Al-Salmi HS, Jacobs-Slifka K, et al. Risk factors for Middle East respiratory syndrome coronavirus infection among healthcare personnel. *Emerg Infect Dis*. 2016;22(11):1915-20. Epub 2016/10/22. doi: 10.3201/eid2211.160920. PubMed PMID: 27767011; PubMed Central PMCID: PMC5088034.
33. Lau JTF, Fung KS, Wong TW, et al. SARS transmission among hospital workers in Hong Kong. *Emerg Infect Dis*. 2004b;10(2):280-6. doi: 10.3201/eid1002.030534. PubMed PMID: 15030698.
34. Loeb M, Dafoe N, Mahony J, et al. Surgical mask vs N95 respirator for preventing influenza among health care workers: a randomized trial. *JAMA*. 2009;302(17):1865-71. Epub 2009/10/03. doi: 10.1001/jama.2009.1466. PubMed PMID: 19797474.
35. MacIntyre CR, Wang Q, Cauchemez S, et al. A cluster randomized clinical trial comparing fit-tested and non-fit-tested N95 respirators to medical masks to prevent respiratory virus infection in health care workers. *Influenza Other Respir Viruses*. 2011;5(3):170-9. Epub 2011/04/12. doi: 10.1111/j.1750-2659.2011.00198.x. PubMed PMID: 21477136; PubMed Central PMCID: PMC4941587.
36. MacIntyre CR, Wang Q, Seale H, et al. A randomized clinical trial of three options for N95 respirators and medical masks in health workers. *Am J Respir Crit Care Med*. 2013;187(9):960-6. Epub 2013/02/16. doi: 10.1164/rccm.201207-1164OC. PubMed PMID: 23413265.
37. Caputo KM, Byrick R, Chapman MG, et al. Intubation of SARS patients: infection and perspectives of healthcare workers. *Can J Anaesth*. 2006;53(2):122-9. Epub 2006/01/26. doi: 10.1007/bf03021815. PubMed PMID: 16434750.
38. MacIntyre CR, Seale H, Dung TC, et al. A cluster randomised trial of cloth masks compared with medical masks in healthcare workers. *BMJ Open*. 2015;5(4):e006577. Epub



2015/04/24. doi: 10.1136/bmjopen-2014-006577. PubMed PMID: 25903751; PubMed Central PMCID: PMC4420971.

39. Radonovich LJ, Jr., Simberkoff MS, Bessesen MT, et al. N95 Respirators vs medical masks for preventing influenza among health care personnel: a randomized clinical trial. *JAMA*. 2019;322(9):824-33. Epub 2019/09/04. doi: 10.1001/jama.2019.11645. PubMed PMID: 31479137; PubMed Central PMCID: PMC6724169
